# Supplementary material
Source: PubMed Central journal article supplement (PMC7482060)

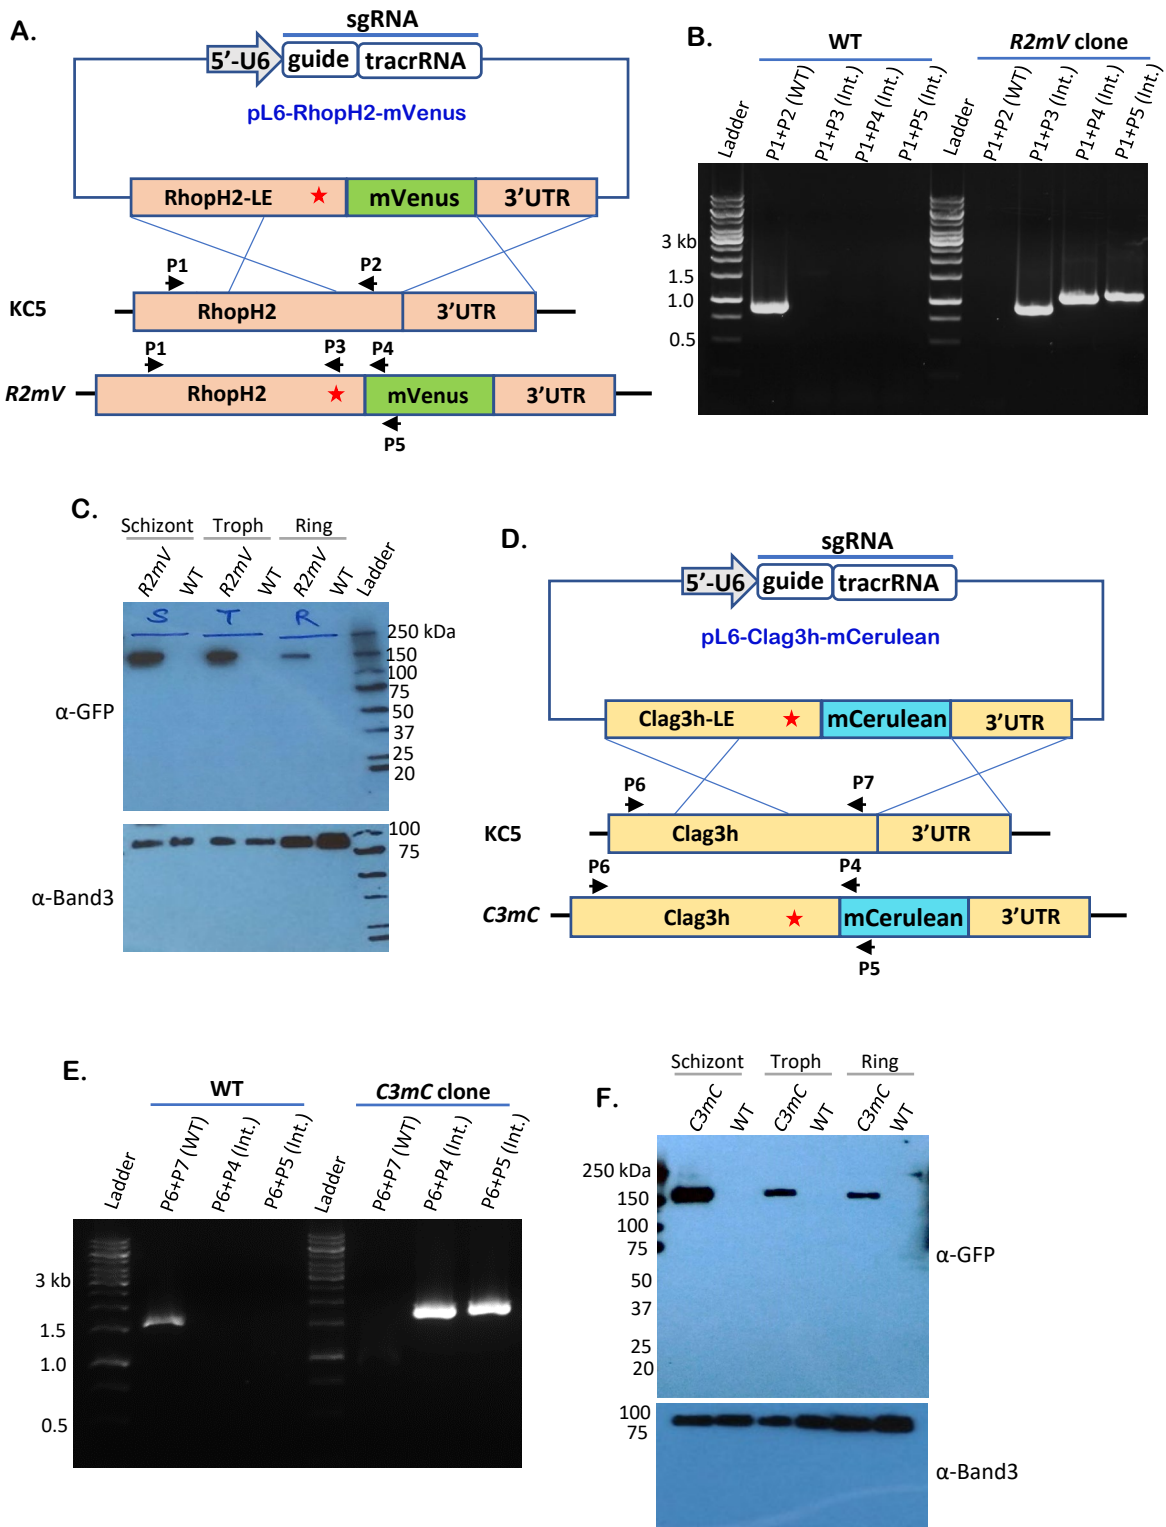

Supplement: mBio.01354-20-sf001.pdf [file mBio.01354-20-sf001.pdf]

**A.**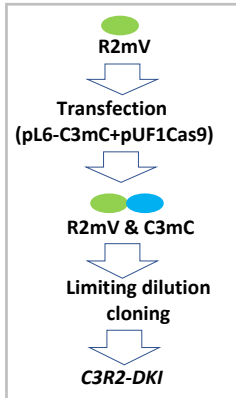**B.**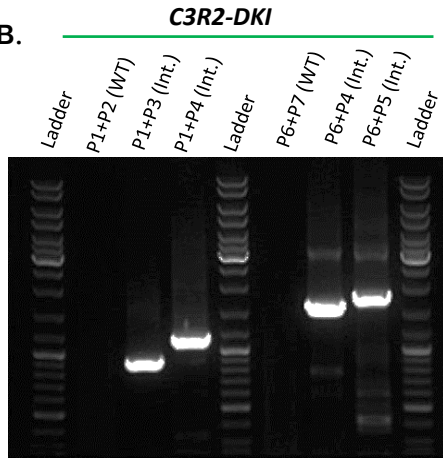**C.**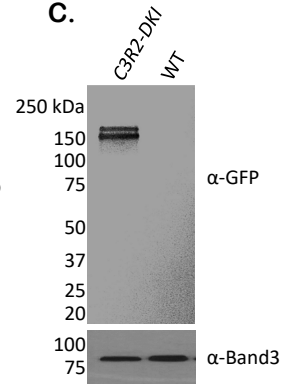**D.**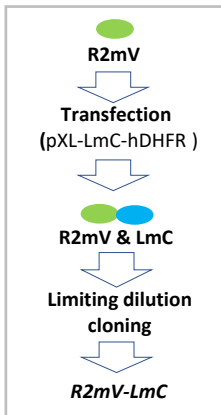**E.**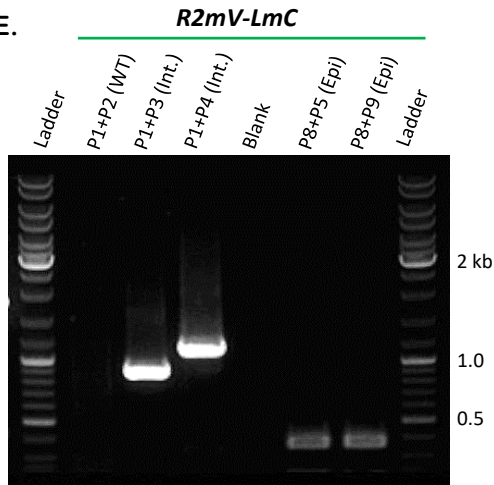

Supplement: mBio.01354-20-sf002.pdf [file mBio.01354-20-sf002.pdf]

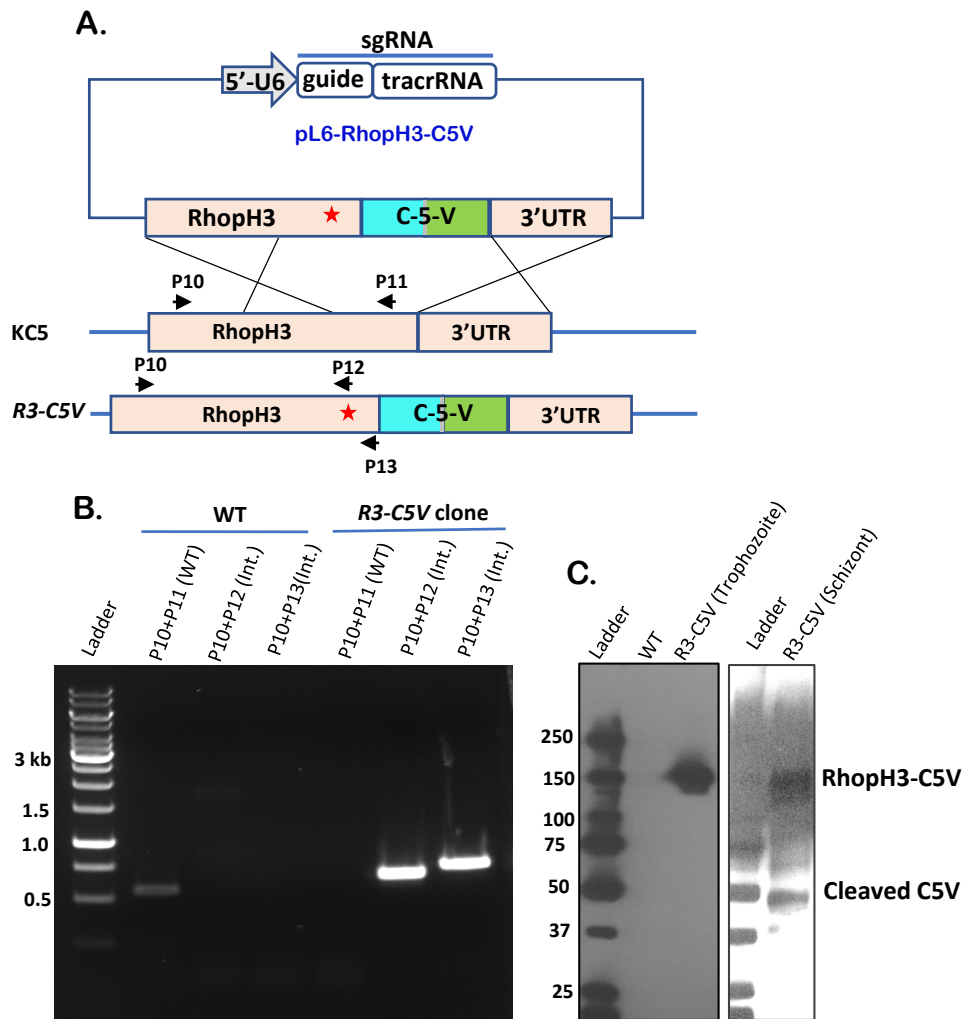

Supplement: mBio.01354-20-sf003.pdf [file mBio.01354-20-sf003.pdf]
